# Supplementary material for: Effect of the array of amines on the transfection efficiency of cationic peptidomimetic lipid molecules into neural cells
Source: Royal Society of Chemistry journal article supplement (doi:10.1039/d2ra03347j), 2022-01-01

**Loading  
Control  
siRNA**

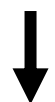

**N3**

**Irrelevant sample**

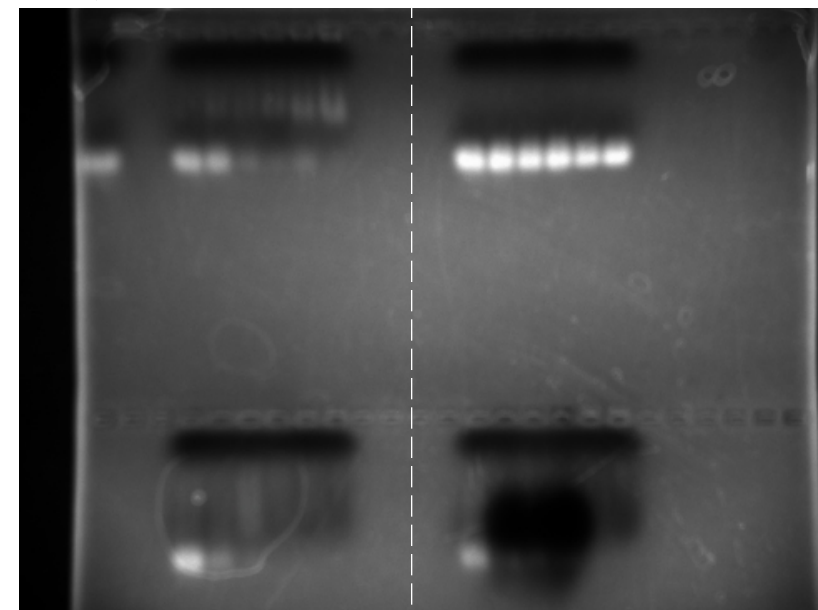

**N5**

**Irrelevant sample**

Loading  
Control  
siRNA

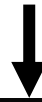

Irrelevant  
t  
sample

N4

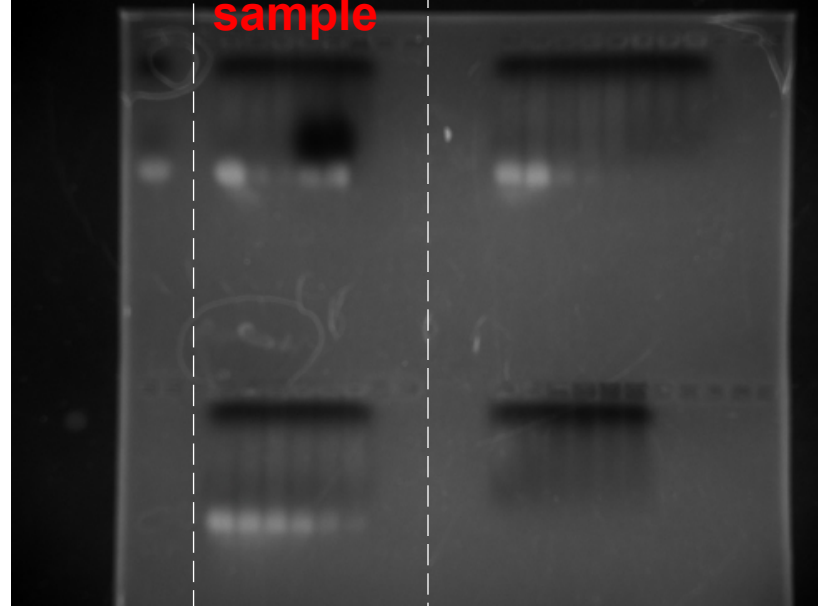

Irrelevant  
sample

Irrelevant  
sample

Loading  
Control  
siRNA

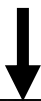

Irrelevant  
sample

N6

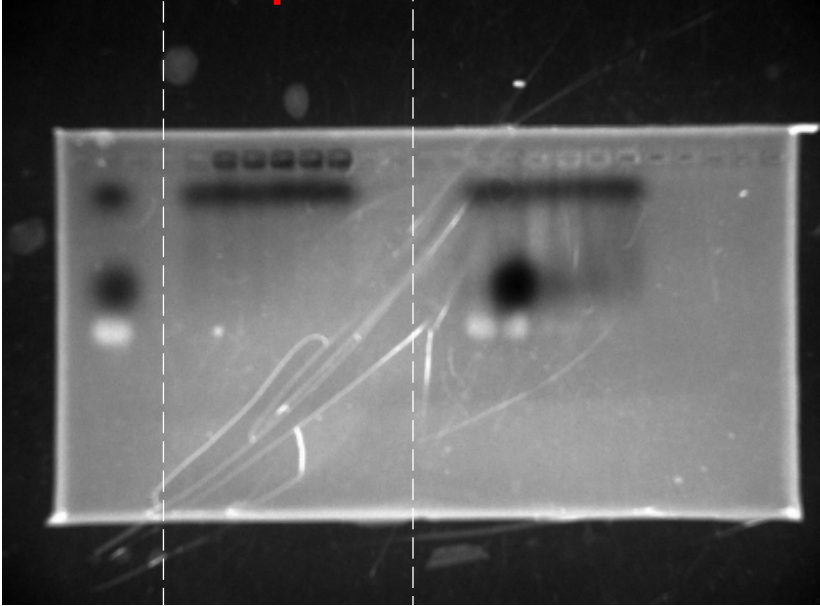

Supplement: d2ra03347j2.pdf [file d2ra03347j2.pdf]
